# Supplementary material
Source: PubMed Central journal article supplement (PMC8923227)
Supplement: aac.02132-21-s0001.pdf [file aac.02132-21-s0001.pdf]

Supplemental figure 1: Study treatment groups assignment

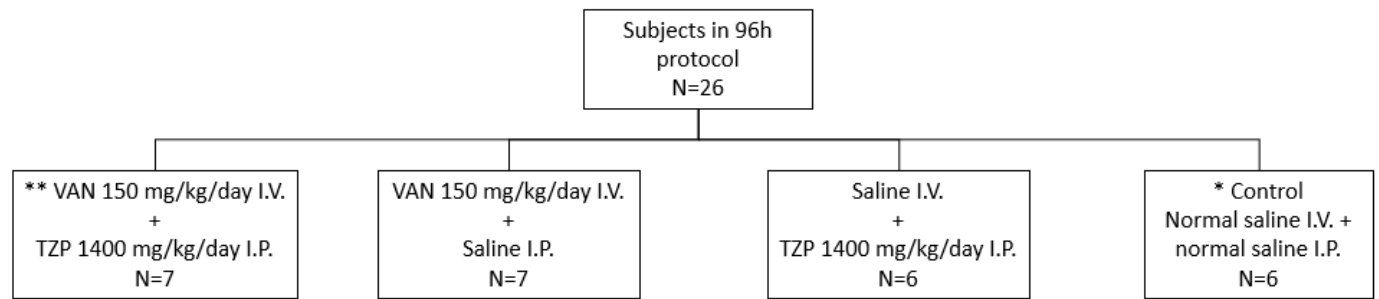

Animal dosing group disposition. Abbreviations: VAN, vancomycin; TZP, piperacillin-tazobactam; I.V., intravenous; I.P., intraperitoneal.

\* One animal contributed partial GFR data

\*\* One animal contributed partial plasma data

Supplemental figure 2: Overall experimental timeline

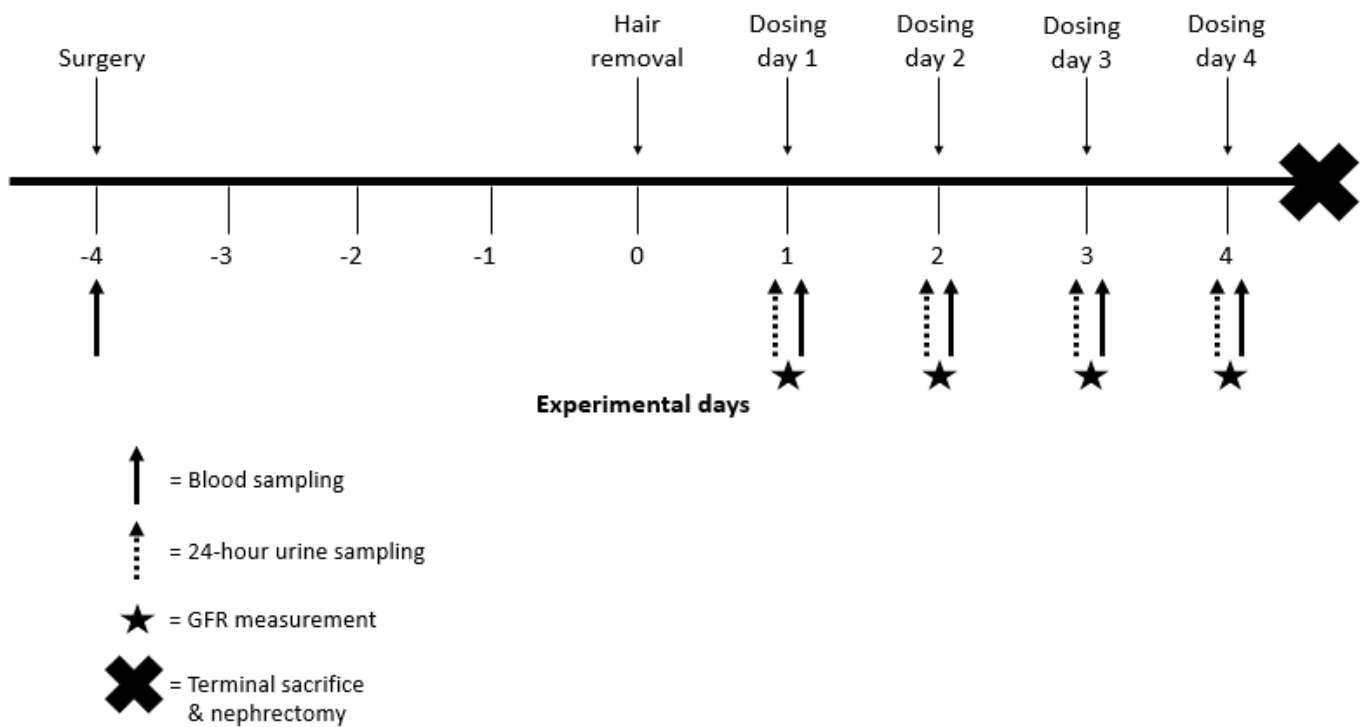

Supplemental figure 3: Daily experimental timeline

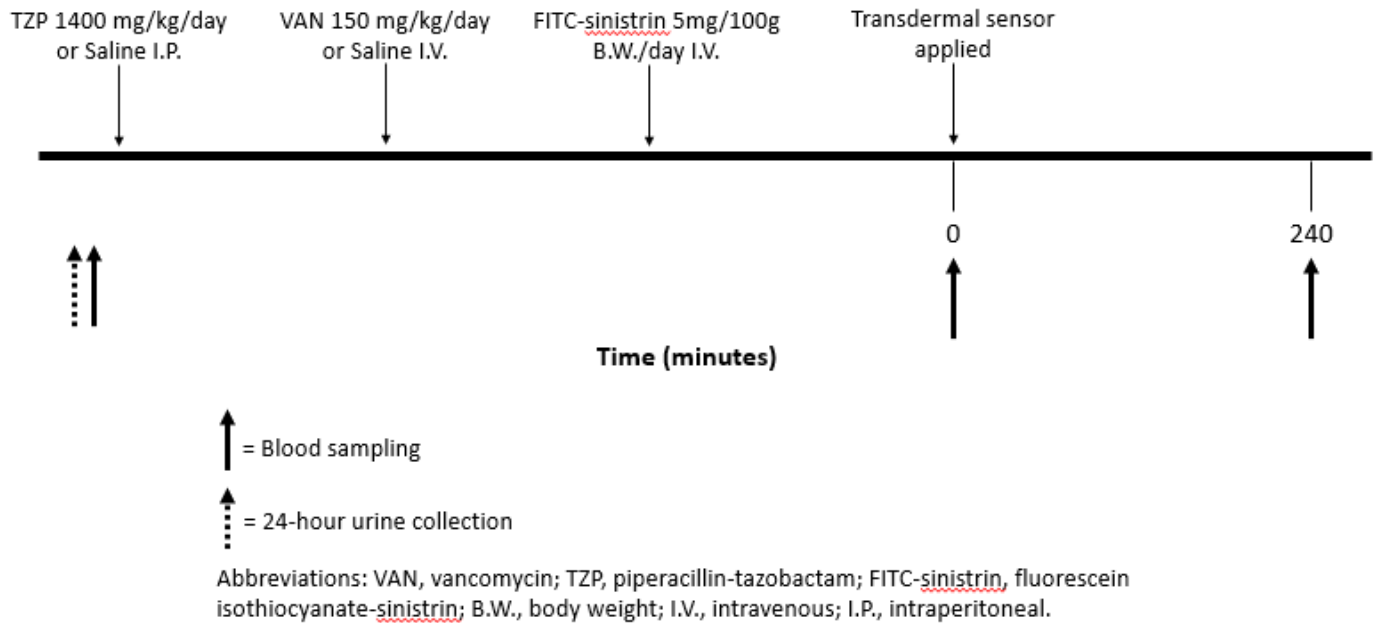

Supplemental figure 4: Direct comparison of individual GFRs in the VAN+TZP and VAN alone groups. Only rats which received VAN had a significant decline in GFR by day 4 (-0.35 mL/min/100 g body weight, 95% CI: -0.63 to -0.07,  $p=0.013$ ).

Supplemental figure 4: GFR comparison between VAN+TZP and VAN+Saline groups

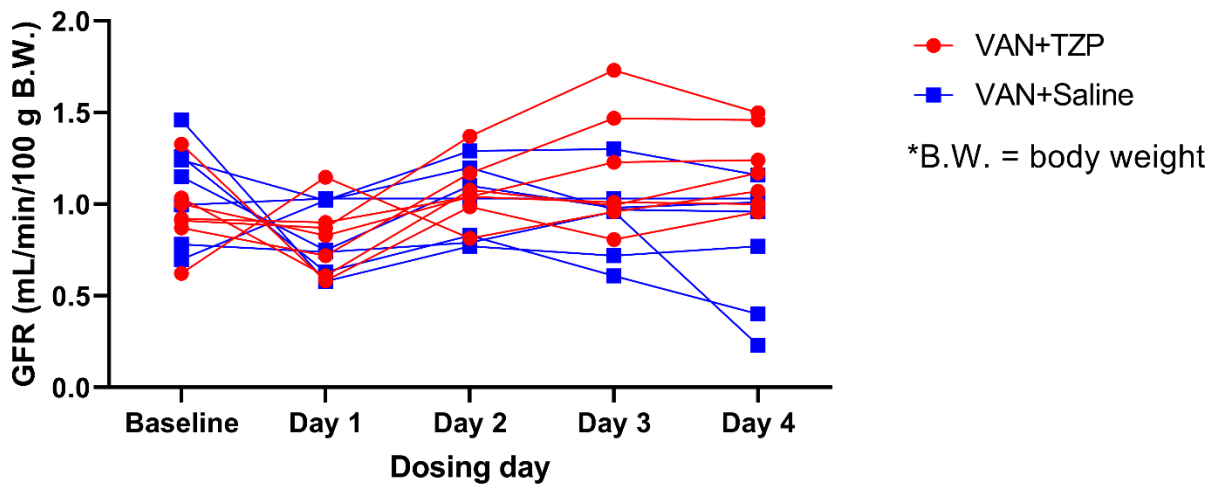

Supplemental figure 5: Spearman correlations between GFR and 24-hour urinary KIM-1 across treatment days for VAN+TZP and VAN alone groups. On day 0 (baseline), all rats in both VAN+TZP and VAN groups had similarly low KIM-1 levels prior to administration of study drug. After drug dosing on day 1 and day 2, we begin to see VAN group rats (red data points) with decreased GFR and higher KIM-1 levels. Following study drug dosing on day 3, urinary KIM-1 for the VAN group was significantly correlated with decreasing GFR (Spearman's rho: -0.45,  $p = 0.022$ ). A similar correlation was observed between GFR and KIM-1 for the VAN group rats on day 4 (Spearman's rho: -0.41,  $p = 0.036$ ).

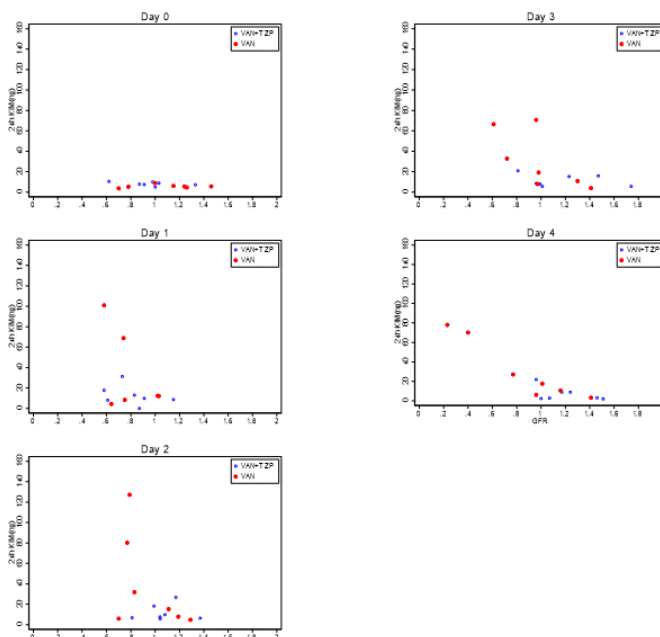

**Supplementary Table 1: Summary of weight loss, urinary output, and urinary biomarkers**

| Characteristic                     | Treatment group     |                     |                     |                      |
|------------------------------------|---------------------|---------------------|---------------------|----------------------|
|                                    | VAN                 | TZP                 | VAN+TZP             | Saline control       |
| Number of animals                  | 7                   | 6                   | 7                   | 6                    |
| Baseline weight (g), mean $\pm$ SD | 274.04 $\pm$ 8.46   | 280.53 $\pm$ 13.29  | 277.46 $\pm$ 5.19   | 278.25 $\pm$ 11.04   |
| Weight change (g), mean $\pm$ SD   | -1.39 $\pm$ 6.09    | -2.27 $\pm$ 6.25    | -1.59 $\pm$ 5.44    | +5.50 $\pm$ 9.06     |
| Urine output (mL), mean $\pm$ SD   |                     |                     |                     |                      |
| Baseline                           | 8.73 $\pm$ 3.09     | 10.95 $\pm$ 4.78    | 11.43 $\pm$ 3.95    | 8.1 $\pm$ 1.42       |
| Day 1                              | 15.67 $\pm$ 3.7     | 12.98 $\pm$ 2.88    | 17.1 $\pm$ 3.07     | 11.58 $\pm$ 1.59     |
| Day 2                              | 8.83 $\pm$ 2.63     | 6.40 $\pm$ 2.54     | 9.13 $\pm$ 2.6      | 8.38 $\pm$ 2.18      |
| Day 3                              | 7.64 $\pm$ 3.22     | 7.73 $\pm$ 3.53     | 10.34 $\pm$ 3.57    | 7.15 $\pm$ 1.37      |
| Day 4                              | 13.4 $\pm$ 8.95     | 4.43 $\pm$ 3.65     | 11.3 $\pm$ 5.53     | 4.49 $\pm$ 3.27      |
| KIM-1 (ng), median (IQR)           |                     |                     |                     |                      |
| Baseline                           | 5.58 (4.59 to 6.09) | 6.43 (5.7 to 7.65)  | 7.91 (7.2 to 9.94)  | 7.22 (6.73 to 7.92)  |
| Day 1                              | 12.2 (8.37 to 68.8) | 8.44 (5.81 to 9.46) | 9.88 (8.12 to 17.8) | 9.97 (8.74 to 10.44) |
| Day 2                              | 15.3 (5.91 to 80.2) | 5.53 (4.18 to 6.88) | 7.59 (6.4 to 18.2)  | 8.58 (8.4 to 9.70)   |
| Day 3                              | 19.3 (8.0 to 66.6)  | 6.11 (4.26 to 8.31) | 8.5 (5.7 to 15.9)   | 8.62 (7.69 to 10.1)  |
| Day 4                              | 17.7 (6.21 to 70.2) | 1.92 (0.4 to 3.16)  | 3.2 (2.46 to 9.03)  | 6.3 (3.2 to 9.98)    |
| Clusterin (ng), median (IQR)       |                     |                     |                     |                      |
| Baseline                           | 2282 (1466 to 3004) | 2734 (2120 to 3080) | 3750 (2608 to 5164) | 1743 (1074 to 2563)  |
| Day 1                              | 4362 (2021 to 4505) | 2314 (1962 to 2829) | 3879 (2517 to 8381) | 2186 (1281 to 2496)  |
| Day 2                              | 2564 (1431 to 7520) | 1168 (787 to 1401)  | 2522 (1291 to 3150) | 1380 (1075 to 2342)  |
| Day 3                              | 2139 (1530 to 5572) | 1268 (1139 to 1421) | 2534 (1497 to 4592) | 1160 (832 to 1456)   |
| Day 4                              | 1199 (833 to 2429)  | 219 (129 to 1895)   | 746 (573 to 3269)   | 616 (401 to 1376)    |

| Osteopontin (ng), median (IQR)         |                     |                     |                     |                     |
|----------------------------------------|---------------------|---------------------|---------------------|---------------------|
| Baseline                               | 0.31 (0 to 0.68)    | 0.38 (0.15 to 0.60) | 0.38 (0 to 0.837)   | 0.29 (0.21 to 0.31) |
| Day 1                                  | 0.99 (0.27 to 1.32) | 0.86 (0.48 to 1.35) | 0.58 (0.45 to 1.68) | 0.33 (0.22 to 0.48) |
| Day 2                                  | 1.33 (0.84 to 2.58) | 0.77 (0.56 to 1.12) | 0.88 (0.65 to 1.40) | 0.62 (0.44 to 0.70) |
| Day 3                                  | 2.16 (0.67 to 2.34) | 1.01 (0.42 to 1.46) | 1.12 (1.09 to 1.68) | 0.37 (0.17 to 0.43) |
| Day 4                                  | 0.54 (0.23 to 1.02) | 0.23 (0.06 to 0.50) | 0.49 (0.36 to 0.81) | 0.15 (0.11 to 0.19) |
| GFR (mL/min/100 g B.W.), mean $\pm$ SD |                     |                     |                     |                     |
| Baseline                               | 1.08 $\pm$ 0.27     | 1.09 $\pm$ 0.38     | 0.96 $\pm$ 0.21     | 1.08 $\pm$ 0.53     |
| Day 1                                  | 0.79 $\pm$ 0.19     | 0.98 $\pm$ 0.18     | 0.81 $\pm$ 0.19     | 0.97 $\pm$ 0.26     |
| Day 2                                  | 0.95 $\pm$ 0.24     | 1.06 $\pm$ 0.12     | 1.07 $\pm$ 0.17     | 1.06 $\pm$ 0.13     |
| Day 3                                  | 0.99 $\pm$ 0.29     | 1.15 $\pm$ 0.14     | 1.17 $\pm$ 0.33     | 1.01 $\pm$ 0.22     |
| Day 4                                  | 0.85 $\pm$ 0.42     | 1.11 $\pm$ 0.23     | 1.20 $\pm$ 0.22     | 1.24 $\pm$ 0.18     |
